# Supplementary material for: Unexpected Phonon Behaviour in BiFexCr1−xO3, a Material System Different from Its BiFeO3 and BiCrO3 Parents
Source: MDPI journal article supplement (doi:10.3390/nano12091607), 2022-05-09
Supplement: s1 [file s1]

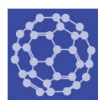

# Unexpected Phonon Behaviour in $\text{BiFe}_x\text{Cr}_{1-x}\text{O}_3$ , a Material System Different from Its $\text{BiFeO}_3$ and $\text{BiCrO}_3$ Parents

Cameliu Himcinschi <sup>1,\*</sup>, Felix Drechsler <sup>1</sup>, David Sebastian Walch <sup>2,3</sup>, Akash Bhatnagar <sup>2,3</sup>, Alexei A. Belik <sup>4</sup> and Jens Kortus <sup>1</sup>

<sup>1</sup> Institute of Theoretical Physics, TU Bergakademie Freiberg, D-09596 Freiberg, Germany; felix.drechsler@student.tu-freiberg.de (F.D.); jens.kortus@physik.tu-freiberg.de (J.K.)

<sup>2</sup> Zentrum für Innovationskompetenz SiLi-nano, Martin-Luther-Universität Halle-Wittenberg, D-06120 Halle (Saale), Germany; david.knoche@physik.uni-halle.de (D.S.W.); akash.bhatnagar@physik.uni-halle.de (A.B.)

<sup>3</sup> Institut für Physik, Martin-Luther-Universität Halle-Wittenberg, D-06120 Halle (Saale), Germany

<sup>4</sup> International Center for Materials Nanoarchitectonics (WPI-MANA), National Institute for Materials Science (NIMS), Namiki 1-1, Ibaraki, Tsukuba 305-0044, Japan; alexei.belik@nims.go.jp

\* Correspondence: himcinsc@physik.tu-freiberg.de

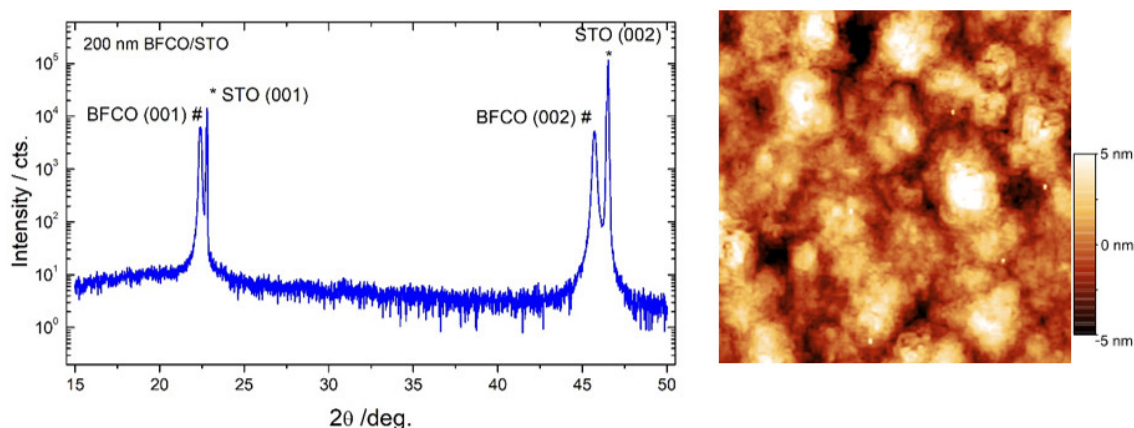

**Figure S1.** X-Ray diffraction  $2\theta$ - $\omega$  scan comprising (001) and (002) peaks of STO substrate and 200 nm BFCO thin film (left panel). Topography scan ( $5 \times 5 \mu\text{m}^2$ ) acquired by atomic force microscopy (contact mode) of the same BFCO thin film (right panel).

The crystallinity and phase purity of the BFCO films were confirmed by X-ray analysis and a  $2\theta - \omega$  scan around the (001) and (002) substrate peak (\*) is presented in Figure S1 (left panel). The peaks of the film are marked by #. The growth under compressive epitaxial strain results in a smooth topography (AFM in Figure S1, right panel) with a root-mean-square roughness of  $\sim 1.98 \text{ nm}$ .

## Synchrotron X-ray Powder Diffraction (XRPD)

### Experiments

Synchrotron X-ray powder diffraction (XRPD) data were measured between 300 K and 600 K on the beamline BL02B2 of SPring-8 [1]; the intensity data were collected between  $2.08^\circ$  and  $78.22^\circ$  at  $0.006^\circ$  intervals in  $2\theta$  and the incident beam was monochromatized at  $\lambda = 0.42014 \text{ \AA}$ . The samples were put into Lindemann glass capillaries (inner diameter: 0.1 mm), which were rotated during measurements. Synchrotron XRPD data were analyzed by the Rietveld method using the *RIETAN-2000* program [2].

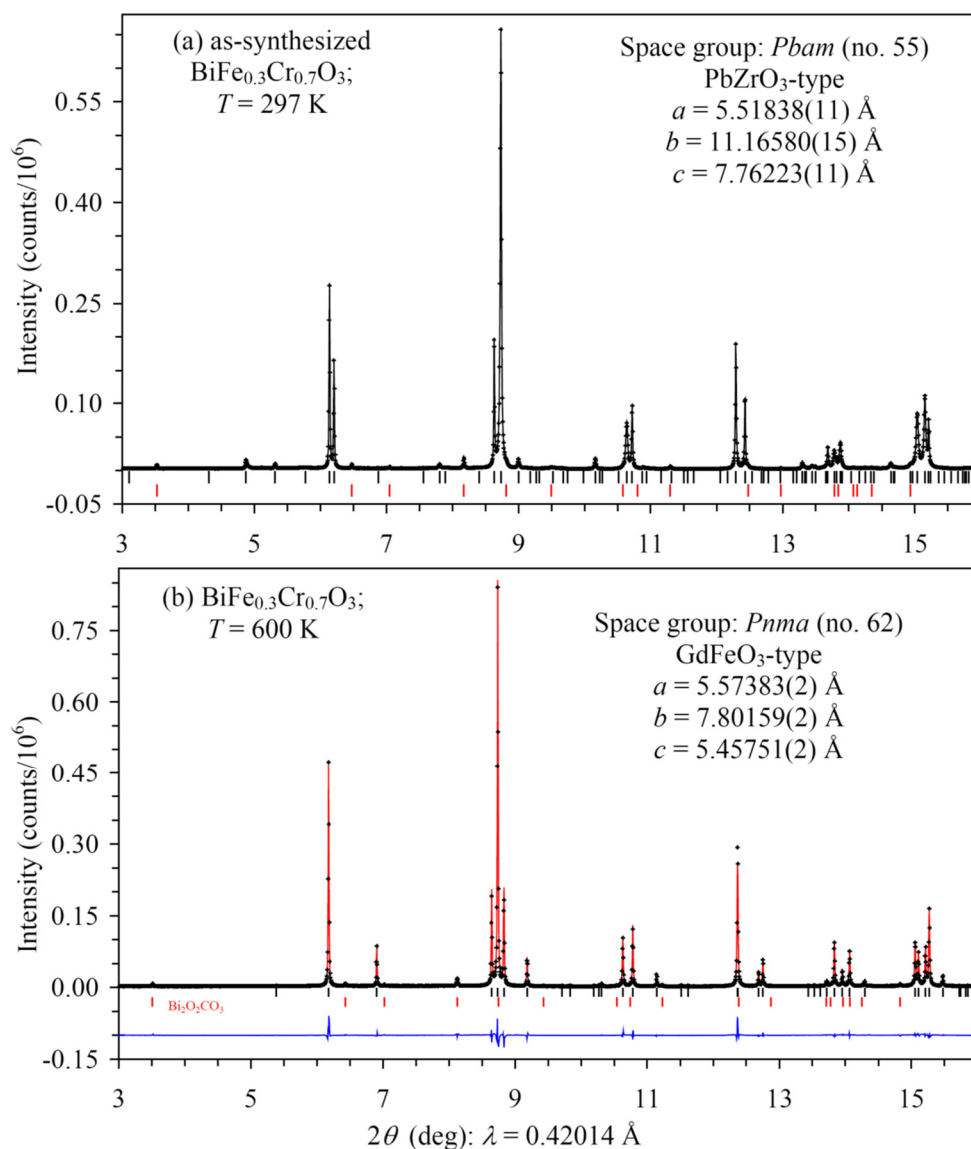

**Figure S2.** High-temperature synchrotron powder X-ray diffraction measurements of the  $\text{BiFe}_{0.3}\text{Cr}_{0.7}\text{O}_3$  sample confirmed the existence of a reversible high-temperature structural phase transition from the  $\text{PbZrO}_3$ -type structure (at room temperature) to the  $\text{GdFeO}_3$ -type structure (at 600 K).

Experimental synchrotron XRPD data are shown by black crosses, and the calculated curve is given by line. Blue line shows a difference curve between the experimental and calculated data at 600 K. The tick marks show possible Bragg reflection positions for the main  $\text{BiFe}_{0.3}\text{Cr}_{0.7}\text{O}_3$  phase (the first black row) and  $\text{Bi}_2\text{O}_2\text{CO}_3$  impurity (the second red row). The refined lattice parameters in the corresponding models are listed on the figure.

## References

1. Kawaguchi, S.; Takemoto, M.; Osaka, K.; Nishibori, E.; Moriyoshi, C.; Kubota, Y.; Kuroiwa, Y.; Sugimoto, K. High-throughput powder diffraction measurement system consisting of multiple MYTHEN detectors at beamline BL02B2 of SPring-8. *Rev. Sci. Instrum.* **2017**, *88*, 085111.
2. Izumi, F.; Ikeda, T. A Rietveld-analysis program RIETAN-98 and its applications to zeolites. *Mater. Sci. Forum* **2000**, 321–324, 198–205.
